# Supplementary material
Source: Springer Nature journal article supplement (https://www.springermedizin.de/resource/supplementary/13063_2012_1141_MOESM1_ESM.pdf/9619384)
Supplement: MOESM1 [file 9619384]

**One Standard Drink is**



Half pint of regular beer, lager or cider



1 small glass of wine



1 single measure of spirits



1 small glass of sherry



1 single measure of aperitifs

**The following quantities of alcohol contain more than 1 standard drink**



**2**

Pint of Regular Beer/Lager/Cider



**3**

Pint of Premium Beer/Lager/Cider



**1.5**

Alcopop or can/bottle of Regular Lager



**2**  
440ml

Can of Premium Lager or Strong Beer



**4**  
440ml

Can of Super Strength Lager



**2**

Glass of Wine (175ml)



**9**

Bottle of Wine

## Is your baby at risk from your drinking?

| Risk                                 | Women                                                                                                                                             | Possible Risks                                                                                                                                                                                                                                                                                                                                                                                                                                                                                                                                                                                                                                                                                    |
|--------------------------------------|---------------------------------------------------------------------------------------------------------------------------------------------------|---------------------------------------------------------------------------------------------------------------------------------------------------------------------------------------------------------------------------------------------------------------------------------------------------------------------------------------------------------------------------------------------------------------------------------------------------------------------------------------------------------------------------------------------------------------------------------------------------------------------------------------------------------------------------------------------------|
| <b>LOW RISK</b>                      | <p><b>Avoid alcohol altogether.</b><br/>If you do choose to drink, you should drink no more than 1-2 units of alcohol once or twice per week.</p> | <ul style="list-style-type: none"> <li>Increase likelihood of a healthy pregnancy</li> <li>Reduce nausea</li> <li>Reduce risk of harm to your baby</li> <li>Improve general health and well-being of both you and your baby</li> </ul>                                                                                                                                                                                                                                                                                                                                                                                                                                                            |
| <b>INCREASED/ HIGH RISK DRINKING</b> | <p>Regularly drinking alcohol<br/>Drinking 3+ units in one occasion<br/>Drinking on three occasions in one week<br/>Getting drunk</p>             | <p><b>1<sup>st</sup> trimester – may lead to:</b></p> <ul style="list-style-type: none"> <li>damage to organs</li> <li>damage to nervous systems</li> <li>mental and physical problems</li> <li>major structural abnormalities</li> <li>spontaneous miscarriage</li> </ul> <hr/> <p><b>2<sup>nd</sup> trimester</b></p> <ul style="list-style-type: none"> <li>Continued risk of damage to central nervous system</li> <li>Continued risk of miscarriage</li> </ul> <hr/> <p><b>3<sup>rd</sup> trimester</b></p> <ul style="list-style-type: none"> <li>Disruption to growth &amp; development</li> <li>Dulled mental abilities</li> <li>Minor abnormalities</li> <li>Low birth weight</li> </ul> |

**Alcohol is dangerous to your baby at anytime during your pregnancy and not just in the first 3 months.**

**Alcohol passes from your blood, through the placenta, to your baby.**

**A baby's liver is one of the last organs to develop fully and therefore cannot process alcohol as well as you can.**

**If you drink alcohol during pregnancy your baby could suffer from Fetal Alcohol Spectrum Disorder (FASD).**

## What is everyone else like?\*

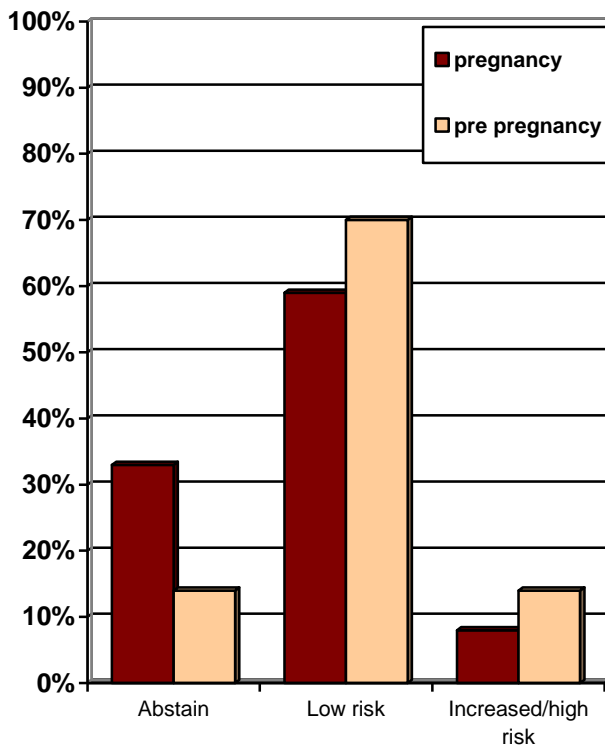

\*Source: Bolling, K. et al. (2007) *Infant Feeding Survey 2005*. London: Dept. of Health

## What are the benefits of cutting down?

### YOU:

#### Physical

- Sleep better
- More energy
- Better physical shape
- Improved complexion & hair
- Reduced nausea
- Reduce risk of premature birth
- Reduced risk of miscarriage

#### Psychological/Social/Financial

- Improved mood
- Improved sense of well-being
- Improved relationships
- Save money

## Making your plan

- Plan activities and tasks at those times you usually drink
- When bored or stressed take exercise instead of drinking
- Explore other interests such as cinema, exercise, etc.
- Avoid going to the pub after work
- Avoid or limit the time spent with 'heavy' drinking friends
- Quench your thirst with non-alcoholic drinks
- If you choose to drink, switch to low alcohol beer/lager/wine
- Take smaller sips
- Avoid drinking in rounds or in large groups
- Don't allow people to 'top you up'

## YOUR BABY:

#### Physical

- Reduced risk of damage to central nervous system
- Reduced risk of damage to developing organs
- Reduced risk of structural abnormalities
- Improved growth & development
- Reduced risk of premature birth
- Reduced risk of miscarriage
- reduced risk of FASD

#### Psychological

- Reduced risk of learning and behavioural disorders

This brief intervention package is based on the Drink-Less programme originally developed at the University of Sydney as part of a W.H.O. collaborative study.

Version 1.0 01/07/11

**RADiANT**
